# Supplementary material
Source: PubMed Central journal article supplement (PMC2836076)
Supplement: supp_M109.086660_jbc.M109.086660-1.pdf [file supp_M109.086660_jbc.M109.086660-1.pdf]

## **SUPPLEMENTARY DATA**

| <b>Pair #</b> | <b>Patient Cell Lines</b> |            |            | <b>Relative Cell Lines</b> |                 |            |
|---------------|---------------------------|------------|------------|----------------------------|-----------------|------------|
|               | <b>Repository #</b>       | <b>Sex</b> | <b>Age</b> | <b>Repository #</b>        | <b>Relation</b> | <b>Age</b> |
| 1             | GM14162                   | M          | 28         | GM14163                    | Mother          | 55         |
| 2             | GM14171                   | M          | 38         | GM14173                    | Father          | 68         |
| 3             | GM14182                   | M          | 22         | GM14183                    | Father          | 55         |
| 4             | GM14268                   | F          | 19         | GM14267                    | Mother          | 49         |
| 5             | GM14291                   | F          | 11         | GM14292                    | Mother          | 39         |
| 6             | GM14297                   | F          | 32         | GM14295                    | Mother          | 62         |

### **Supplementary Table S1.**

#### **Coriell Cell Repository Cell lines**

Cell line repository number (#), sex and age of the patients from which the lymphoblastoid cell lines were derived. The Pair number (#) corresponds to the pairing shown on the graphs (Fig. 3 and Fig. S1). Full details of the cell lines and the patients from which they are derived is available at <http://ccr.coriell.org>

| Name           | Sequence                                                                                                                   |
|----------------|----------------------------------------------------------------------------------------------------------------------------|
| mIRD1ex1F      | CCAGAGGCGACTGGATCTAC                                                                                                       |
| mIRD1ex3R      | ACGAAGACGCTCTCATTGTG                                                                                                       |
| mIRD1ex6F      | TACAGCACTTCGATGCCCAACCAC                                                                                                   |
| mIRD1ex7/8R    | GATCCCCTTCTCTGACTTGTCATG                                                                                                   |
| mHPRTF         | AGCTTGCTGGTGAAAAGGAC                                                                                                       |
| mHPRTR         | TCAACTTGCGCTCATCTTAG                                                                                                       |
| hCYLN2F        | AAATCCCTGTCGGATCAGAG                                                                                                       |
| hCYLN2R        | TTTGCAGAACCGGAATTGCC                                                                                                       |
| hGTF2IF        | CTGGAAATCAGCTCCATGAG                                                                                                       |
| hGTF2IR        | GATCTGAGAGCTTCCATCAG                                                                                                       |
| hIRD1ex21F     | TGGAGAGGATTCTTGCTGTG                                                                                                       |
| hIRD1ex23R     | CCTCACCGTATTTCTCGTTG                                                                                                       |
| hIRD1ex25F     | GGCTGGAGAAGATCCTGAAG                                                                                                       |
| hIRD1ex27R     | ATGCTGCTGTCTTTGGCTGG                                                                                                       |
| hGAPDHF        | CCATGTTTCGTCATGGGTGTG                                                                                                      |
| hGAPDHR        | CATCCACAGTCTTCTGGGTG                                                                                                       |
| hIRD1LZdel     | TTAAGCTTACCATGGACTTCCTCAGGTTCTGCCG                                                                                         |
| GURF           | TGCGGGCTAATCCCGTATGTAAATG                                                                                                  |
| GURF MUT       | TGCGGGCT <b>TG</b> ACCCGTATGTAAATG                                                                                         |
| GURR           | TTTGTTCTGTAATCCAGTAAGATTG                                                                                                  |
| GURR MUT       | TTTGTTCTGTT <b>G</b> ACCCAGTAAGATTG                                                                                        |
| GUR MID<br>MUT | TGCGGGCTAATCCCGTATGTAAATGACAGCCAATGGAGGGTGGTGTGCGCGGGGC<br>TGGGT <b>CA</b> AGGGCCGGGGCGAATGGCTGGCAATCTTACTGGGATTACAGAACAAA |
| GUR LUC F      | GAGTCTCGAGGCTCCGAGGTTG                                                                                                     |
| GUR LUC R      | GCGAGCGCGAAGCCGAGCCCG                                                                                                      |

**Supplementary Table S2**  
**Names and sequence of**  
**the oligonucleotides**  
**synthesised for all**  
**experiments.**

Bold type indicates the  
position and sequence of  
the mutant residues.

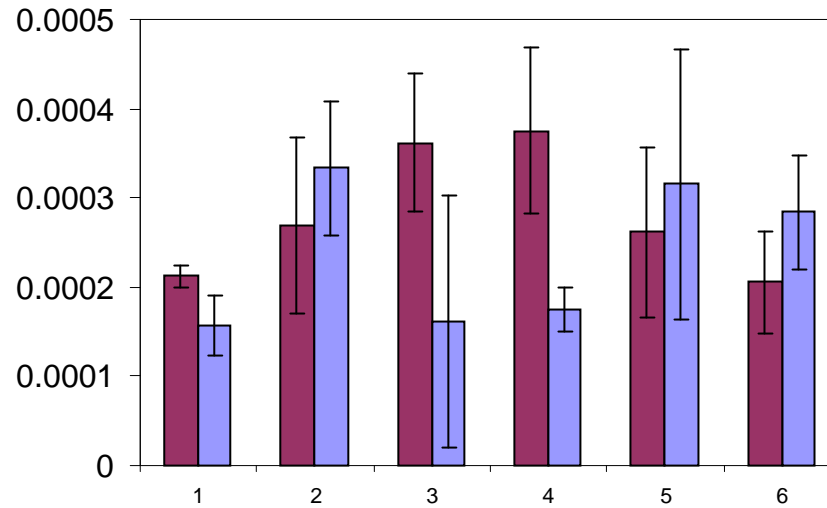

**Supplementary Figure S1**

**A second analysis of *GTF2IRD1* expression in lymphoblastoid cell lines.**

Quantitative RT-PCR analysis of *GTF2IRD1* expression in lymphoblastoid cell lines derived from WBS patients and their relatives (see Table S1) using the primers Ex25F – Ex27R (see Table S2). Magenta bars represent the relative samples and blue bars represent patient samples. Error bars show standard deviations.
